# Supplementary material for: Non-invasive imaging of CSF-mediated brain clearance pathways via assessment of perivascular fluid movement with diffusion tensor MRI
Source: eLife journal article supplement (doi:10.7554/elife.34028), 2018-07-31
Supplement: supp [file elife-34028-supp-v1.zip]

Archive with 4 entries (4 files):
- elife_poa_e34028_Figure_4_figure_supplement_1.pdf
- elife_poa_e34028_Figure_2_figure_supplement_1.pdf
- elife_poa_e34028_Transparent_Reporting_File.docx
- elife_poa_e34028_Figure_3_figure_supplement_1.pdf
