# Supplementary material for: Non-invasive imaging of CSF-mediated brain clearance pathways via assessment of perivascular fluid movement with diffusion tensor MRI
Source: eLife journal article supplement (doi:10.7554/elife.34028), 2018-07-31
Supplement: supp [file elife-34028-supp-v1.zip › elife_poa_e34028_Figure_2_figure_supplement_1.pdf]

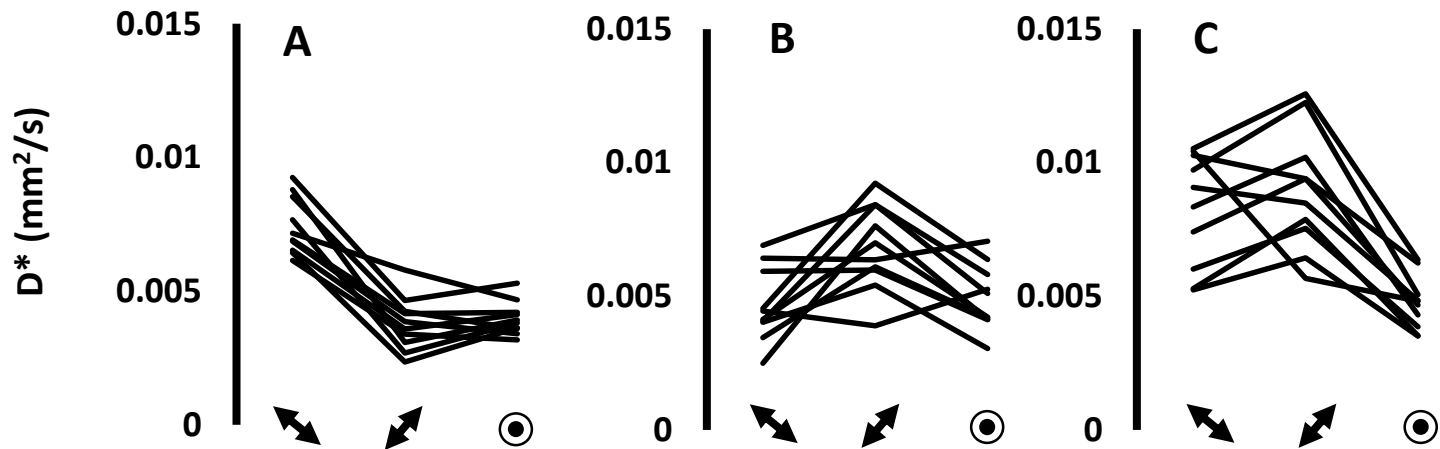

**Figure 2 – figure supplement 1**

The individual animal  $D^*$  calculated within ROIs in the right perivascular space (A), left perivascular space (B), subarachnoid space (C) with the motion probing gradients applied in three orthogonal directions (x-axis). Each line represents an individual animal (n=10).
