# Supplementary material for: Non-invasive imaging of CSF-mediated brain clearance pathways via assessment of perivascular fluid movement with diffusion tensor MRI
Source: eLife journal article supplement (doi:10.7554/elife.34028), 2018-07-31
Supplement: supp [file elife-34028-supp-v1.zip › elife_poa_e34028_Figure_3_figure_supplement_1.pdf]

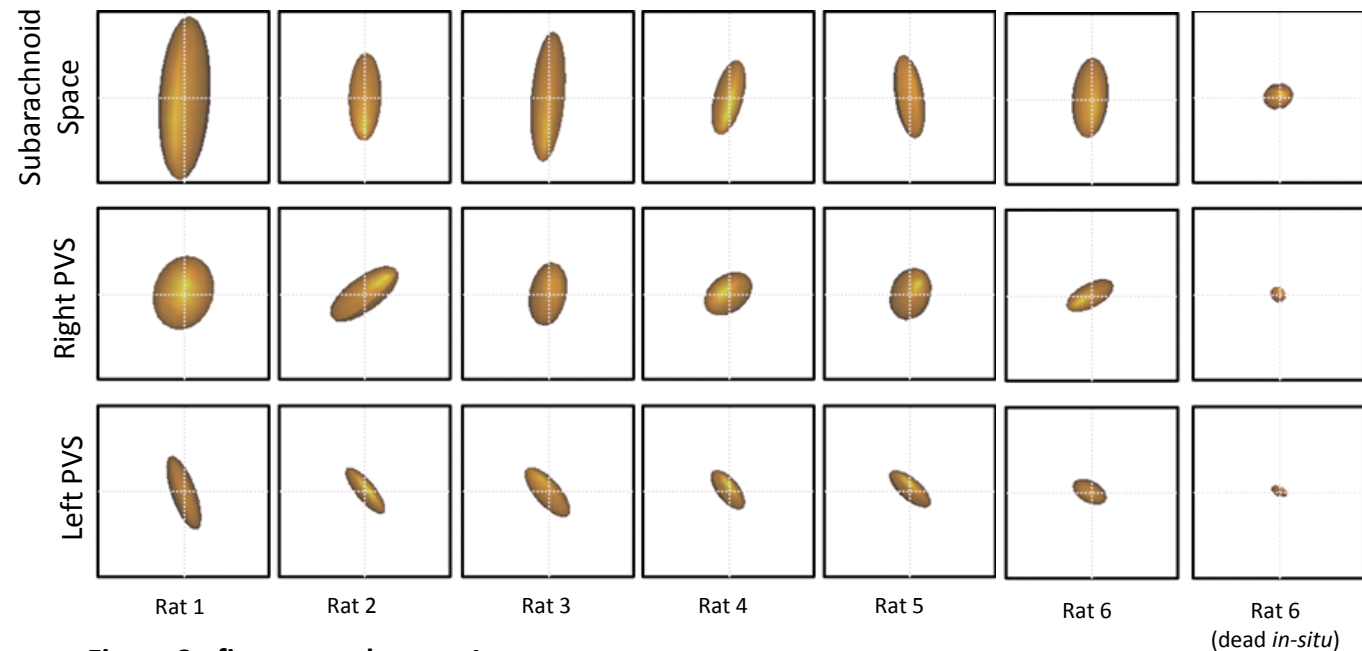

**Figure 3– figure supplement 1**

D\* tensors within the left and right perivascular space (PVS) and subarachnoid space ROIs for each of the individual subjects imaged in part ii). The corresponding D\* tensor for the dead brain is also shown.
