# Supplementary material for: Non-invasive imaging of CSF-mediated brain clearance pathways via assessment of perivascular fluid movement with diffusion tensor MRI
Source: eLife journal article supplement (doi:10.7554/elife.34028), 2018-07-31
Supplement: supp [file elife-34028-supp-v1.zip › elife_poa_e34028_Figure_4_figure_supplement_1.pdf]

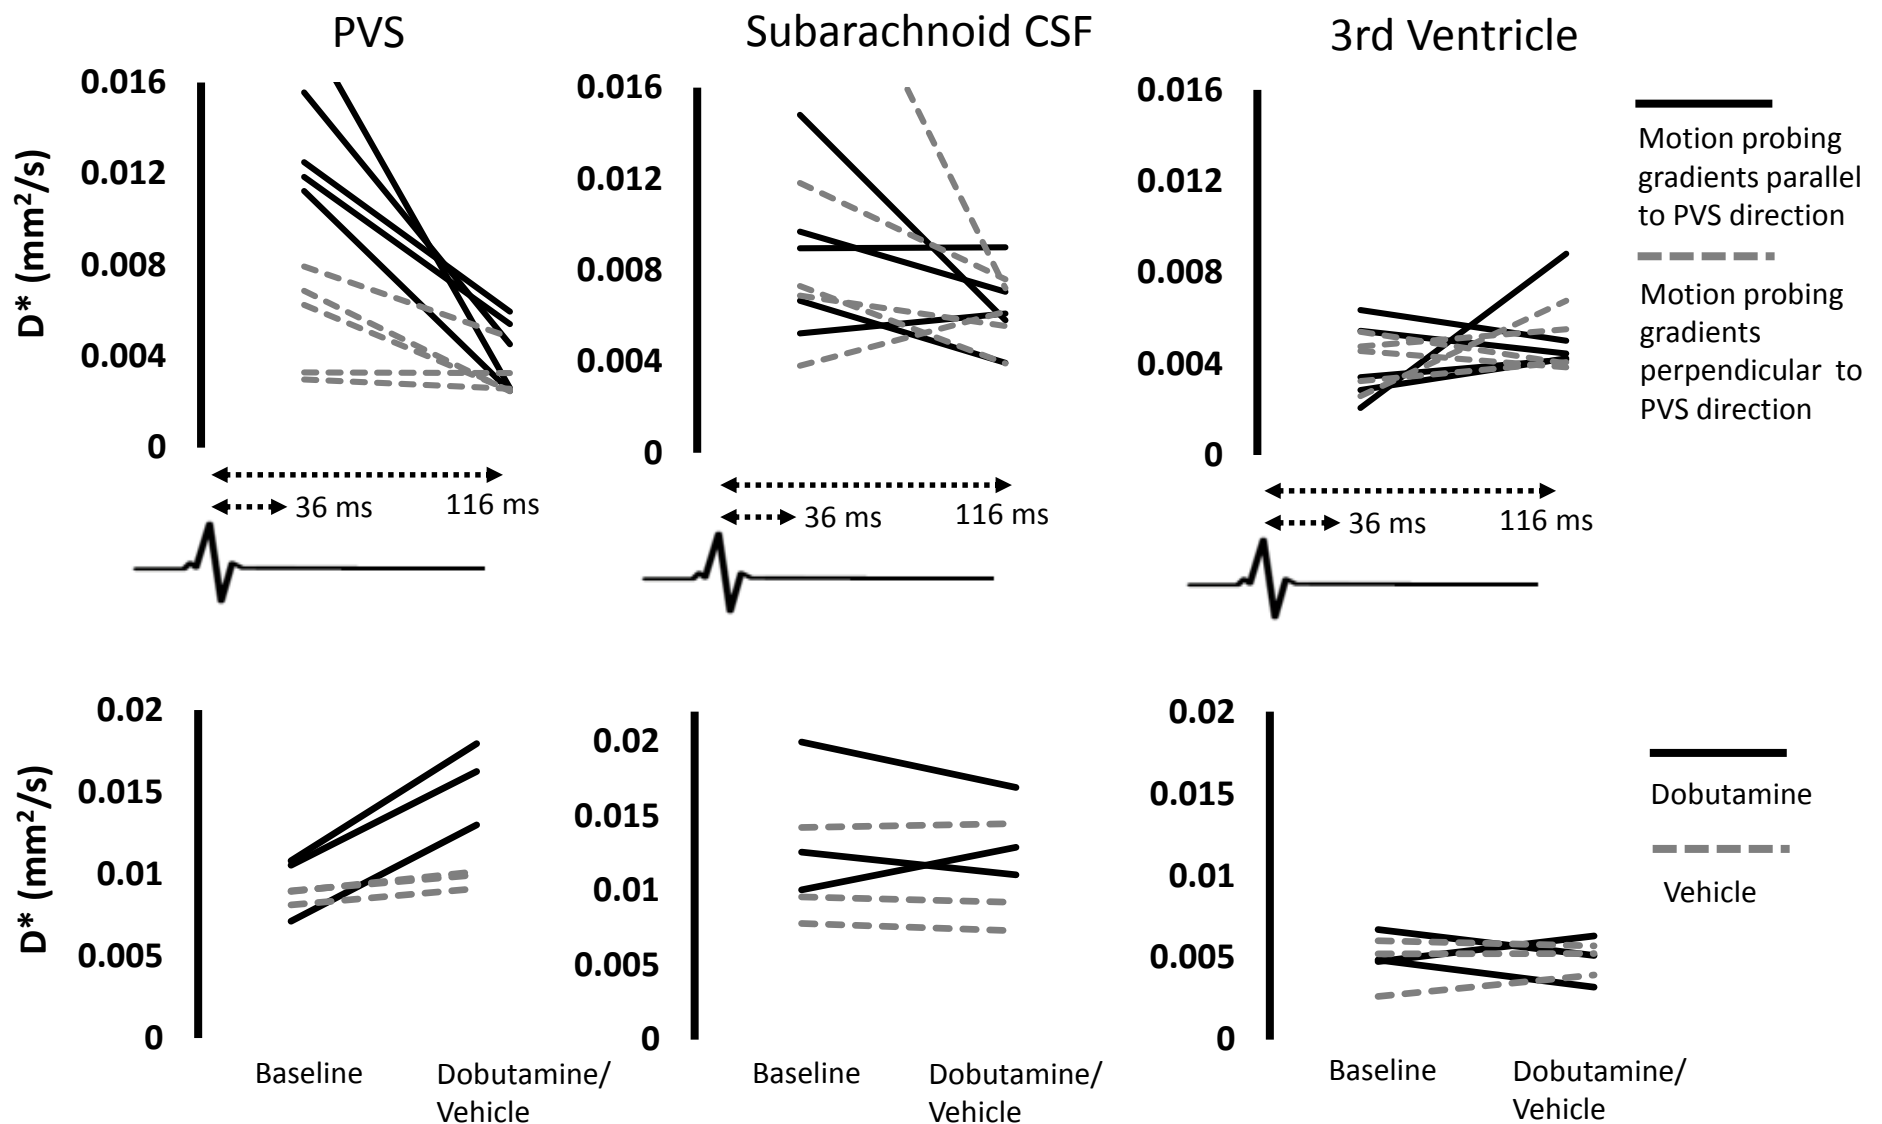

**Figure 4 – figure supplement 1**

**A.** The individual animal  $D^*$  during arterial pulsation and diastole respectively within the three ROIs for MPGs applied parallel (black line) and perpendicular to (grey dashed line) PVS orientation. **B.** The mean  $D^*$  at baseline and after dobutamine (black line) or vehicle (grey dashed line) within the same ROIs (non-gated). Each line represents an individual animal.
